# Supplementary material
Source: Springer Nature journal article supplement (https://www.springermedizin.de/resource/supplementary/12936_2012_2140_MOESM1_ESM.pdf/9542666)

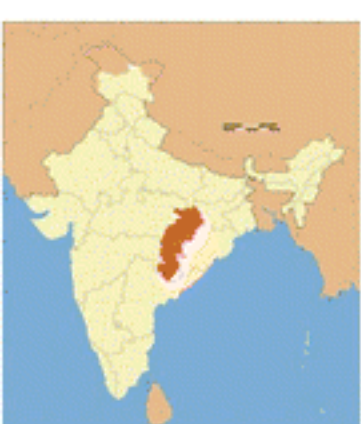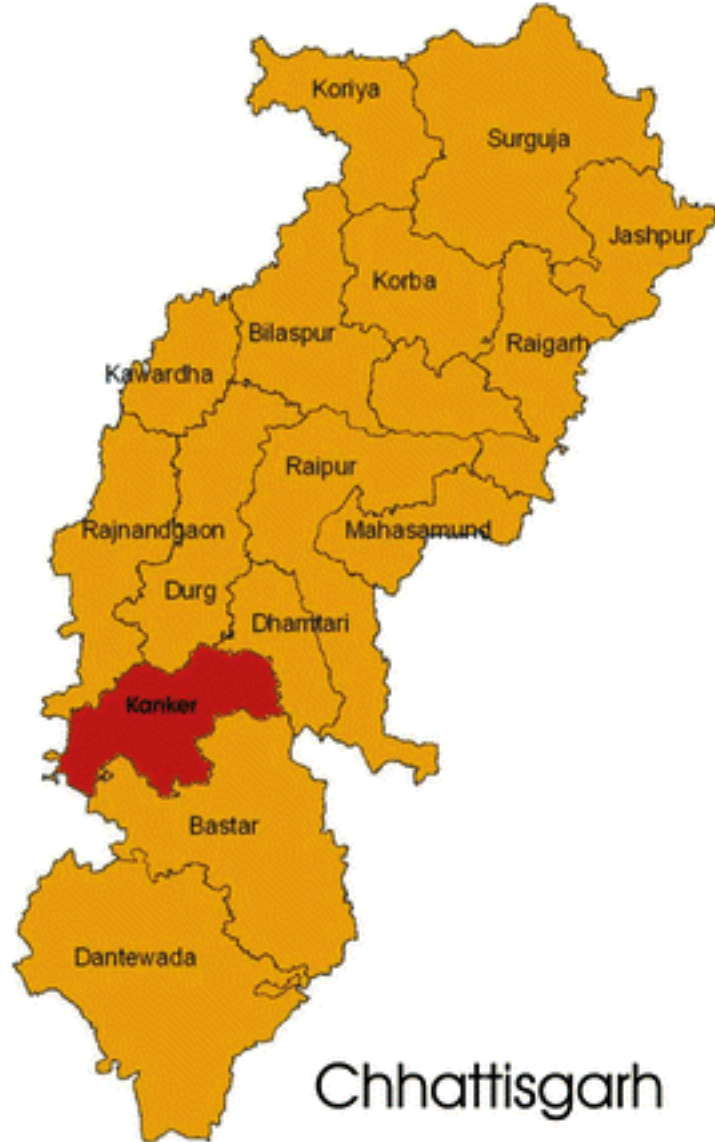

## District Kanker

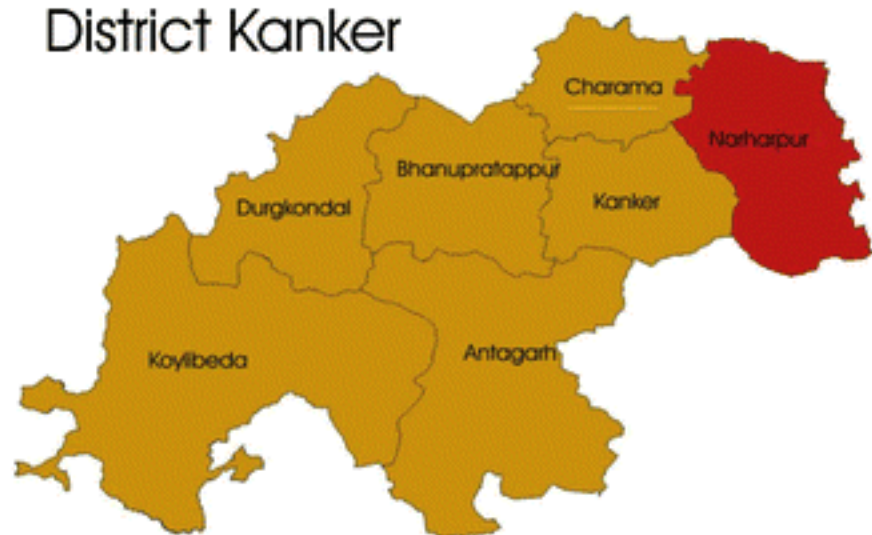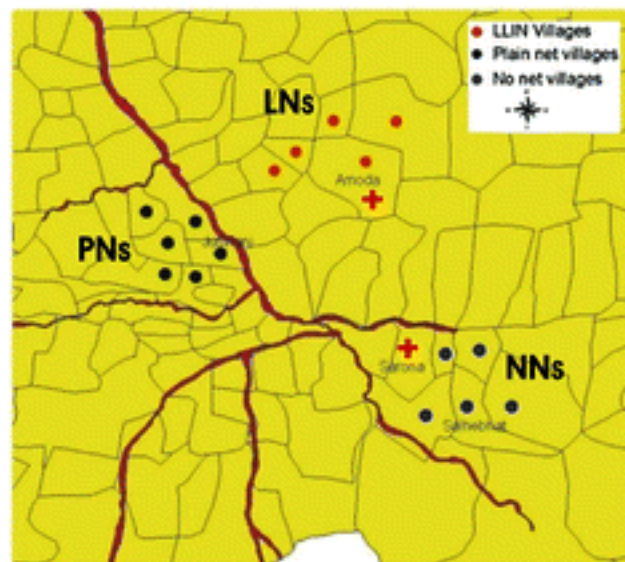

Study villages in Narharpur Block

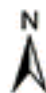

Supplement: MOESM1 [file 9542666]
